# Supplementary material
Source: HighWire-hosted journal article supplement (https://cmajopen.ca/highwire/filestream/90149/field_highwire_adjunct_files/1/open-2022-0023-original-submission.pdf)
Supplement: open-2022-0023-original-submission.pdf [file open-2022-0023-original-submission.pdf]

1  
2  
3 **Trends in Antihypertensive Drug Utilization in British Columbia,**  
4  
5 **2004–2019**  
6  
7

8  
9 Jason D. Kim MPH, Anat Fisher MD PhD, Colin Dormuth ScD

10  
11  
12 Department of Anesthesiology, Pharmacology and Therapeutics, The University of British  
13  
14 Columbia, Vancouver, British Columbia, Canada  
15  
16  
17

18  
19  
20  
21 **Corresponding author:**

22  
23 Jason D. Kim

24  
25 Department of Anesthesiology, Pharmacology and Therapeutics

26  
27 2176 Health Sciences Mall, Vancouver, BC Canada V6T 1Z3

28  
29 Email: jason.kim@ubc.ca  
30  
31  
32  
33  
34  
35  
36  
37

38 **Funding statement:** This project was funded by the British Columbia Ministry of Health,  
39  
40 Pharmaceutical, Laboratory & Blood Services Division. All inferences, opinions, and  
41  
42 conclusions drawn in this manuscript are those of the authors, and do not reflect the opinions or  
43  
44 policies of the British Columbia Ministry of Health.  
45  
46

47 **Competing interest statement:** The authors declare that they have no competing interests.  
48  
49

50 **Word count:** Abstract 250; Text 2500  
51  
52  
53  
54  
55  
56  
57  
58  
59  
60

## ABSTRACT

**Background:** The real-world impact of recent changes to clinical guidelines for hypertension is currently unknown. We aimed to evaluate trends in antihypertensive drug utilization over a 16-year period (2004–2019) in British Columbia.

**Methods:** Our two-part study included: 1) a longitudinal study that described the annual prevalence and incidence rate of using five antihypertensive drug classes (thiazide, angiotensin-converting enzyme inhibitor (ACEI), angiotensin II receptor blocker (ARB), calcium channel blocker, beta-blocker) in individuals aged 30 to 75 years (2004–2019); and 2) a cohort study comparing the risk of discontinuation, switch or add-on therapy between incident users of the above drug classes (2004–2014). We performed Cox regression analysis adjusted for age, sex, income level, and geographical area to estimate hazard ratios (HR).

**Results:** The incidence rate of using one of the five drug classes decreased by 22.9% from 2004 to 2014, and increased by 23.8% from 2014 to 2019. The prevalence and incidence rate of thiazide use decreased by 18.4% and 64.0% respectively, from 2004 to 2019, while those for the other drug classes increased. Incident users on thiazide monotherapy were more likely to discontinue any antihypertensive treatment versus ACEI monotherapy (HR=0.96, 95% CI: 0.95–0.97) and thiazide with ACEI/ARB (HR=0.96, 95% CI: 0.94–0.98), and were most likely to switch or add on.

**Interpretation:** Increasing incidence rates of antihypertensive therapy after 2014 followed the publication of new evidence and guidelines recommending lower blood pressure targets. The prevalence and incidence rate of thiazide use decreased compared with other drug classes.

## INTRODUCTION

Hypertension is a modifiable risk factor for cardiovascular disease and accounts for 10% of the Canadian healthcare budget.[1] In Canada, five antihypertensive drug classes are recommended for the initial treatment of individuals with hypertension and without other compelling indications.[2] Of the five drug classes, thiazide-type and thiazide-like diuretics (“thiazides”) have shown to significantly reduce mortality and cardiovascular events, including stroke and coronary heart disease in individuals with moderate to severe primary hypertension.[3] Thiazides are also the least expensive treatment option in Canada, presenting an opportunity for cost-savings. Other recommended drug classes include angiotensin-converting enzyme inhibitors (ACEIs), angiotensin II receptor blocker (ARBs), dihydropyridine calcium channel blockers (CCBs), and beta-blockers[2,4,5], although the evidence supporting them are not as robust.

Clinical guidelines for the treatment and management of hypertension continue to be updated with new evidence. In 2017, the American College of Cardiology and American Heart Association (ACC/AHA) redefined the diagnostic blood pressure (BP) threshold for hypertension from 140/90 to 130/80 mmHg regardless of individuals’ cardiovascular risk, lowered BP targets to under 130/80 mmHg, and recommended earlier initiation of pharmacotherapy for low-risk individuals at a threshold of 140/90 mmHg.[4] Hypertension Canada, for selected high-risk individuals, lowered the diagnostic threshold from 140/90 to 130/80 mmHg and recommended a systolic BP target under 120 mmHg.[6] The BP targets were informed by the results of two meta-analyses,[7,8] and the Systolic Blood Pressure Intervention Trial (SPRINT), which concluded that intensive lowering of systolic BP targets to <120 mmHg compared with <140 mmHg resulted in a 25% reduction in major cardiovascular events and all-

1  
2  
3 cause mortality among high-risk individuals without diabetes.[9] These changes were expected  
4  
5 to impact the prevalence and incidence of hypertension (i.e., reclassification of previously non-  
6  
7 hypertensive individuals) and the use of antihypertensive drugs (i.e., initiation of  
8  
9 pharmacotherapy in treatment-naïve individuals or intensification of treatment to reach BP  
10  
11 targets).[10,11] Trends in antihypertensive drug use have been responsive to the findings of  
12  
13 clinical trials and changes in guidelines up to 2014;[12] however, the impact of more recent  
14  
15 guidelines on antihypertensive prescribing is not currently known. In this study, we aimed to 1)  
16  
17 evaluate trends in antihypertensive drug utilization in British Columbia (BC) over a 16-year  
18  
19 period (2004–2019), and 2) compare the risk of discontinuation and switch or add-on therapy in  
20  
21 incident users of antihypertensive drugs.  
22  
23  
24  
25  
26  
27  
28  
29

## 30 **METHODS**

### 31 *Setting and data source*

32  
33  
34  
35  
36  
37 The study was conducted in the province of BC and comprised two parts: 1) utilization trends  
38  
39 and 2) time to discontinuation, switch or add-on therapy analyses. We used anonymized, linkable  
40  
41 administrative health databases of the BC Ministry of Health. The data consisted of prescription  
42  
43 drug dispensing records at community pharmacies, registry data on enrollment in the provincial  
44  
45 health plan and demographics, outpatient physician services, and inpatient hospitalizations.  
46  
47  
48  
49

### 50 *Trends in antihypertensive drug utilization*

51  
52  
53 We identified a source population of BC residents aged 30 to 75 years who were enrolled in the  
54  
55 provincial health plan between January 1, 2004 and December 31, 2019. We excluded  
56  
57  
58  
59  
60

1  
2  
3 beneficiaries of the First Nations Health Authority and federal programs for whom we had no  
4 access to drug data. From the source population, we identified prevalent and incident users of the  
5 following antihypertensive drug classes: thiazides, ACEIs, ARBs, CCBs, and beta-blockers. We  
6 defined “prevalent use” as a dispensing of at least one antihypertensive drug during the year, and  
7 “incident use” as a dispensing of an antihypertensive drug with no record of any antihypertensive  
8 drug (listed in **Table S1**) dispensed in the previous five years. Prevalence was expressed as a  
9 percentage, computed as the number of prevalent users divided by the total number of  
10 individuals in the source population during the calendar year. Incidence was expressed as a rate  
11 per 1000 person-years, computed as the number of incident users divided by the total person-  
12 years of health plan enrollment for the source population during the calendar year.  
13  
14  
15  
16  
17  
18  
19  
20  
21  
22  
23  
24  
25  
26  
27

### *Discontinuation, switch or add-on therapy*

#### Incident user cohort

28  
29  
30  
31 From the source population, we constructed an incident user cohort comprising individuals who  
32 initiated antihypertensive treatment on thiazide monotherapy, ACEI monotherapy, ARB  
33 monotherapy, combination thiazide with ACEI/ARB, or CCB between January 1, 2004 and  
34 December 31, 2014. Cohort entry was defined as 91 days after initial dispensing. Individuals  
35 were excluded from the cohort if they were not continuously enrolled in the provincial health  
36 plan during the previous two years, had missing information on age or sex, were under 30 or  
37 over 75 years of age, died before cohort entry, received both ACEI and ARB at initial  
38 dispensing, or were diagnosed with cancer, renal failure, secondary hypertension, or other  
39 conditions indicated for the antihypertensive drug classes (**Table S2**) anytime before cohort  
40  
41  
42  
43  
44  
45  
46  
47  
48  
49  
50  
51  
52  
53  
54  
55  
56  
57  
58  
59  
60

1  
2  
3 entry. Individuals were also excluded if they experienced the outcome between initial dispensing  
4  
5 and cohort entry.  
6

### 7 8 Outcomes 9

10  
11 Two outcomes were assessed: 1) discontinuation of any antihypertensive therapy and 2) switch  
12  
13 to or add-on of a different antihypertensive drug class. Discontinuation was assigned using the  
14  
15 refill-sequence model,[13] where the first medication-free gap of 90 days for any  
16  
17 antihypertensive drug (**Table S1**) was considered discontinuation of antihypertensive therapy.  
18  
19 The discontinuation date was defined as the expected date of the next prescription refill. We did  
20  
21 not adjust for stockpiling. Individuals who switched between antihypertensive drug classes  
22  
23 before a 90-day gap were considered persistent users.  
24  
25

26  
27  
28 Switch or add-on therapy was defined as the first dispensing of an antihypertensive drug class  
29  
30 different from the initial drug class (**Table S1**). Switching from a combination product to its  
31  
32 different components was not considered a switch or add-on. Individuals were censored in the  
33  
34 case of death, end of MSP enrollment, or end of follow-up. Additionally, for the switch or add-  
35  
36 on analysis, individuals were censored if they discontinued antihypertensive therapy.  
37  
38

### 39 40 Statistical analysis 41

42  
43 Cox regression models compared the hazards of discontinuation, switch or add-on between  
44  
45 incident users on thiazide monotherapy and incident users on ACEI monotherapy, ARB  
46  
47 monotherapy, thiazide with ACEI/ARB, and CCB. The multivariate models included adjustment  
48  
49 for age, sex, income level, and geographical area (defined in **Table S3**). Analyses were  
50  
51 performed using R software version 3.6.1. The study protocol was approved by the University of  
52  
53 British Columbia Clinical Research Ethics Board (H19-03491).  
54  
55  
56  
57  
58  
59  
60

## RESULTS

### *Trends in antihypertensive drug utilization*

The overall prevalence of the five antihypertensive drug classes increased by 19.3% (from 17.2% [in 2004] to 20.6% [in 2019]) (**Figure 1**). Prevalent use of ACEIs, the most prescribed drug class throughout the study period, increased by 15.5% (from 8.7% [in 2004] to 10.1% [in 2019]).

Prevalent use of ARBs and CCBs also increased, by 84.9% for ARBs (from 3.1% [in 2004] to 5.7% [in 2019]) and by 109.4% for CCBs (from 2.9% [in 2004] to 6.0% [in 2019]). Prevalent use of thiazides increased by 12.8% in the first five years (from 8.5% [in 2004] to 9.5% [in 2009]) and subsequently decreased by 27.6% (from 9.5% [in 2009] to 6.9% [in 2019]) (**Figure 2**).

The overall incidence rate for the five drug classes decreased by 22.9% in the first ten years (from 23.7 [in 2004] to 18.3 [in 2014] per 1000 person-years) and subsequently increased by 23.8% (from 18.3 [in 2014] to 22.6 [in 2019] per 1000 person-years) (**Figure 1**). Incident use of thiazides decreased by 64.0% (from 8.9 [in 2004] to 3.2 [in 2019] per 1000 person-years) (**Figure 2**). After 2014, incidence rates increased for ACEIs by 25.8% (from 7.7 [in 2014] to 9.7 [in 2019] per 1000 person-years) and for ARBs by 29.8% (from 1.2 [in 2014] to 1.7 [in 2019] per 1000 person-years). Incidence rates increased for CCBs by 225.9% (from 1.2 [in 2004] to 4.0 [in 2019] per 1000 person-years) and for beta-blockers by 8.5% (from 6.5 [in 2004] to 7.1 [in 2019] per 1000 person-years). In an ad hoc analysis of incident users on thiazides, the percentage initiating hydrochlorothiazide decreased by 15.6% (from 88.4% [in 2014] to 74.6% [in 2019]) in favour of chlorthalidone (from 2.4% [in 2014] to 14.4% [in 2019]) and indapamide (from 9.2% [in 2014] to 10.9% [in 2019]) (**Figure S1**).

### *Discontinuation, switch or add-on therapy*

After pre-defined inclusion and exclusion criteria were applied to the source population, the incident user cohort consisted of 232,781 individuals who initiated antihypertensive treatment between 2004 and 2014 (**Table S4**). Most incident users initiated ACEI monotherapy (n=100,670 [43.2%]) and thiazide monotherapy (n=86,008 [36.9%]).

Among all incident users of antihypertensive drugs, the overall median time to discontinuation was 5.58 years (95% CI: 5.53–5.64). Incident users on ARB monotherapy had the shortest median time to discontinuation (4.72 years, 95% CI: 4.48–4.95), and incident users on combination thiazide with ACEI/ARB had the longest (5.93 years, 95% CI: 5.70–6.13) (**Table 1, Figure 3**). In an adjusted Cox regression model, we estimated a 3.8% lower risk of discontinuation for thiazide with ACEI/ARB and 4.1% lower risk for ACEI monotherapy compared with thiazide monotherapy. In an ad hoc analysis stratified by PharmaCare drug coverage (covered/not covered), we found better persistence with ARB monotherapy compared with thiazides in each stratum (**Table S5**).

The overall median time to switch or add-on was 4.76 years (95% CI: 4.72–4.82). Incident users on thiazide monotherapy had the shortest median time to switch (4.26 years, 95% CI: 4.18–4.35) and those on thiazide with ACEI/ARB had the longest (6.95, 95% CI: 6.75–7.21) (**Table 2, Figure 4**). Incident users on thiazide monotherapy had the highest risk of switching or adding on.



## INTERPRETATION

This study described trends in antihypertensive drug utilization in BC over a 16-year period (2004–2019). We observed a historical decrease in incident antihypertensive therapy from 2004 to 2014, followed by an increase from 2014 to 2019. Despite this recent increasing trend, initiation on thiazides continued to decrease, while initiation on ACEIs, ARBs, CCBs, and beta-blockers increased. Although the prevalence of antihypertensive therapy increased by 20.6% from 2004 to 2019, prevalent thiazide use increased by 12.8% from 2004 to 2009 and subsequently decreased by 27.6% from 2009 to 2019. Incident users on thiazide monotherapy had a higher risk of discontinuing any antihypertensive therapy compared with those on ACEI monotherapy and thiazide with ACEI/ARB, as well as a higher risk of switching to or adding on a different antihypertensive drug class compared with those in the other initial drug class groups. Our finding of a decrease in incident antihypertensive therapy between 2004 and 2014 was consistent with a previously reported decrease in the hypertension age-standardized incidence rate of 6 per 1000 population from 1999 to 2012 in BC.[14] The increase in incident antihypertensive therapy from 2015 onwards corresponded in time with the publication of SPRINT (2015) and updated Hypertension Canada (2016) and ACC/AHA (2017) guidelines that lowered recommended BP thresholds and targets.[4,6] Muntner and co-authors estimated that implementation of the revised ACC/AHA BP standards would increase initiation of pharmacological therapy by 1.9% and increase intensified treatment by 14.4% in existing users.[11] We observed a 2.3% greater annual increase in incident antihypertensive therapy between 2017 and 2018 versus the annual increase of the previous year. Increases in prevalence

1  
2  
3 for non-thiazide drug classes may be partially explained by add-on therapy related to treatment  
4 intensification.  
5  
6

7  
8 We observed a decrease in the prevalence and incidence of thiazide use consistent with previous  
9 studies.[12,15,16] Contributing factors to the decrease may be related to concerns around  
10 potential adverse effects associated with thiazides,[17] as well as evidence from the  
11 ACCOMPLISH (2008) trial which concluded that an ACEI/CCB combination was superior in  
12 reducing adverse cardiovascular events in high-risk individuals compared with a thiazide/ACEI  
13 combination.[12,18] However, reasons for the continued decrease in thiazide use remains  
14 unclear. No new trials on first-line drugs for hypertension were identified in the 2017 update to  
15 the original Cochrane systematic review,[3] and studies of real-world evidence on the  
16 comparative effectiveness and safety of antihypertensives provide further support for thiazides as  
17 a preferred first-line option.[19,20] From 2017 to 2018, three Danish observational studies  
18 reported an association between hydrochlorothiazide and skin cancer.[21–23] Following these  
19 studies, hydrochlorothiazide use decreased by 44% in Denmark.[24] We did not observe a  
20 similar impact in BC; however, we found that the proportion of incident thiazide use on  
21 hydrochlorothiazide (thiazide-type diuretics) has decreased since 2014, as preference for  
22 chlorthalidone and indapamide (thiazide-like diuretics) has increased due to their  
23 cardioprotective effects.[2,25–27]  
24  
25  
26  
27  
28  
29  
30  
31  
32  
33  
34  
35  
36  
37  
38  
39  
40  
41  
42  
43  
44  
45

46 Initiation on thiazide monotherapy was associated with a higher risk of treatment discontinuation  
47 compared with initiation on ACEI monotherapy and thiazide with ACEI/ARB. Previous studies  
48 showed similar patterns,[19,28,29] and risk differences ranged from +8.9% to +32.8%.

49 Individuals who perceive side effects from their initial medication are more likely to  
50 discontinue;[30] thus side effects of thiazides may be a potential factor in discontinuation  
51  
52  
53  
54  
55  
56  
57  
58  
59  
60

1  
2  
3 patterns. In our study, incident users on ARB monotherapy had the shortest median time to  
4  
5 discontinuation, which was unexpected given good tolerability profiles of ARBs.[31] Provincial  
6  
7 drug coverage for ARBs differed from other drug classes; less than 9% of individuals on ARB  
8  
9 monotherapy had coverage for their initial prescription compared with 98% of individuals on  
10  
11 other drug classes. Higher drug payment is associated with antihypertensive drug non-  
12  
13 adherence;[30,32] thus drug coverage was considered an intermediate variable in the exposure-  
14  
15 discontinuation pathway and not included as a covariate for adjustment. Simpson's paradox was  
16  
17 observed in ad hoc stratified analysis (i.e., reversal of effect),[33] where we found superior  
18  
19 persistence for ARB monotherapy. We found that incident users on thiazide monotherapy were  
20  
21 more likely to switch to or add on a different antihypertensive drug class compared with incident  
22  
23 users on other drug classes, which was consistent with other studies.[19,28] We also found they  
24  
25 were earlier to switch or add on than to discontinue. These findings may indicate less optimal BP  
26  
27 control with thiazides monotherapy, thus leading to treatment intensification to reach BP targets.  
28  
29  
30  
31  
32  
33  
34 Factors influencing treatment decisions are complex. It is unclear why thiazide use has declined  
35  
36 given their effectiveness and potential for cost-savings.[3,34] Future research areas include  
37  
38 evaluating the impact of prescriber and patient preferences on antihypertensive utilization, as  
39  
40 well as real-world prescribing trends among individuals with specific clinical and demographic  
41  
42 characteristics.[35] Future studies on treatment persistence might also consider accounting for  
43  
44 differences in drug coverage policies across drug exposures in their jurisdiction.  
45  
46  
47

48  
49 A limitation of administrative data is the absence of clinical and laboratory data. Comorbid  
50  
51 conditions, BP measurements, and biochemical markers are important considerations in  
52  
53 individualized treatment.[36] Without these data, we could not evaluate utilization trends  
54  
55 according to clinical characteristics, examine adherence to guidelines, or ascertain reasons for  
56  
57  
58  
59  
60

1  
2  
3 discontinuation, switching or adding. Additionally, individuals were not required to have a  
4  
5 hypertension diagnosis; thus, patients with other conditions (e.g., beta-blocker users with heart  
6  
7 failure) were included and may have resulted in an overestimation of utilization rates.  
8  
9

10 Incidence rates of antihypertensive therapy increased after 2014, following the publication of  
11  
12 new evidence and updated guidelines recommending lower BP thresholds and targets. Initiation  
13  
14 on thiazides decreased from 2004 to 2019 and prevalent thiazide use decreased from 2009 to  
15  
16 2019, while the use of other first-line antihypertensive drugs increased. Incident users on thiazide  
17  
18 monotherapy were more likely to discontinue antihypertensive treatment compared with those on  
19  
20 ACEI monotherapy and thiazide with ACEI/ARB, and more likely to switch to or add on.  
21  
22

23  
24 Further research on factors influencing treatment decisions, and utilization trends according to  
25  
26 clinical characteristics could provide insight into prescribing patterns.  
27  
28  
29  
30  
31  
32  
33  
34  
35  
36  
37  
38  
39  
40  
41  
42  
43  
44  
45  
46  
47  
48  
49  
50  
51  
52  
53  
54  
55  
56  
57  
58  
59  
60

## Acknowledgements

The authors thank Ellen Reynolds for editing a version of this manuscript. The BC Ministry of Health approved access to and use of BC data facilitated by Population Data BC. All inferences, opinions, and conclusions drawn in this manuscript are those of the authors, and do not reflect the opinions or policies of the Data Stewards. The following data sources were used (<https://www2.gov.bc.ca/gov/content/health/conducting-health-research-evaluation/data-access-health-data-central>):

- British Columbia Ministry of Health [creator] (2021): Medical Services Plan (MSP) Payment Information File. BC Ministry of Health [publisher]. MOH (2019);
- British Columbia Ministry of Health [creator] (2021): PharmaNet. BC Ministry of Health [publisher]. Data Stewardship Committee (2019);
- Canadian Institute for Health Information [creator] (2021): National Ambulatory Care Reporting System. BC Ministry of Health [publisher]. MOH (2019);
- Canadian Institute for Health Information [creator] (2021): Discharge Abstract Database (Hospital Separations). BC Ministry of Health [publisher]. MOH (2019);
- British Columbia Ministry of Health [creator] (2021): Consolidation File (MSP Registration & Premium Billing). BC Ministry of Health [publisher]. MOH (2019)

## TABLES

**Table 1. Discontinuation of any antihypertensive therapy in the incident user cohort.**

| Initial Drug Class                      | Discontinued<br>n (%) | Censored<br>n (%) | Median<br>(years)    | Crude HR<br>(95% CI) | Adjusted HR<br>(95% CI)* |
|-----------------------------------------|-----------------------|-------------------|----------------------|----------------------|--------------------------|
| Thiazide<br>Monotherapy<br>n = 86,008   | 55,728 (64.8)         | 30,280<br>(35.2)  | 5.42 (5.33-<br>5.51) | Reference            | Reference                |
| ACEI Monotherapy<br>n = 100,670         | 61,838 (61.4)         | 38,832<br>(38.6)  | 5.89 (5.81-<br>5.97) | 0.96 (0.95-<br>0.97) | 0.96 (0.95-<br>0.97)     |
| ARB Monotherapy<br>n = 11,449           | 7423 (64.8)           | 4026 (35.2)       | 4.72 (4.48-<br>4.95) | 1.07 (1.04-<br>1.09) | 1.06 (1.03-<br>1.08)     |
| Thiazide with<br>ACEI/ARB<br>n = 18,909 | 11,525 (60.9)         | 7384 (39.1)       | 5.93 (5.70-<br>6.13) | 0.96 (0.94-<br>0.98) | 0.96 (0.94-<br>0.98)     |
| CCB<br>n = 15,745                       | 10,085 (64.1)         | 5660 (36.0)       | 4.87 (4.71-<br>5.05) | 1.08 (1.06-<br>1.11) | 1.06 (1.04-<br>1.09)     |

*HR* Hazard ratio; *CI* confidence interval; *ACEI* angiotensin-converting enzyme inhibitor; *ARB* angiotensin II receptor blocker; *CCB* calcium channel blocker.

\* Adjusted for age, sex, income level, geographical area.

**Table 2. Switch to or add-on of a different antihypertensive drug class in the incident user cohort.**

| Initial Drug Class                      | Switched or Added<br>n (%) | Censored<br>n (%) | Median<br>(years)    | Crude HR<br>(95% CI) | Adjusted HR<br>(95% CI)* |
|-----------------------------------------|----------------------------|-------------------|----------------------|----------------------|--------------------------|
| Thiazide<br>Monotherapy<br>n = 75,214   | 39,992 (53.2)              | 35,222<br>(46.8)  | 4.26 (4.18-<br>4.35) | Reference            | Reference                |
| ACEI Monotherapy<br>n = 89,500          | 44,254 (49.4)              | 45,246<br>(50.6)  | 4.53 (4.45-<br>4.62) | 0.98 (0.96-<br>0.99) | 0.93 (0.92-<br>0.95)     |
| ARB Monotherapy<br>n = 10,763           | 4781 (44.4)                | 5982 (55.6)       | 5.48 (5.21-<br>5.67) | 0.84 (0.82-<br>0.87) | 0.82 (0.80-<br>0.85)     |
| Thiazide with<br>ACEI/ARB<br>n = 17,469 | 7184 (41.1)                | 10,285<br>(58.9)  | 6.95 (6.75-<br>7.21) | 0.74 (0.72-<br>0.76) | 0.71 (0.69-<br>0.73)     |
| CCB<br>n = 14,925                       | 6338 (42.5)                | 8587 (57.5)       | 6.59 (6.32-<br>6.92) | 0.75 (0.73-<br>0.77) | 0.74 (0.72-<br>0.76)     |

*HR* Hazard ratio; *CI* confidence interval; *ACEI* angiotensin-converting enzyme inhibitor; *ARB* angiotensin II receptor blocker; *CCB* calcium channel blocker.

\* Adjusted for age, sex, income level, geographical area.

## FIGURES

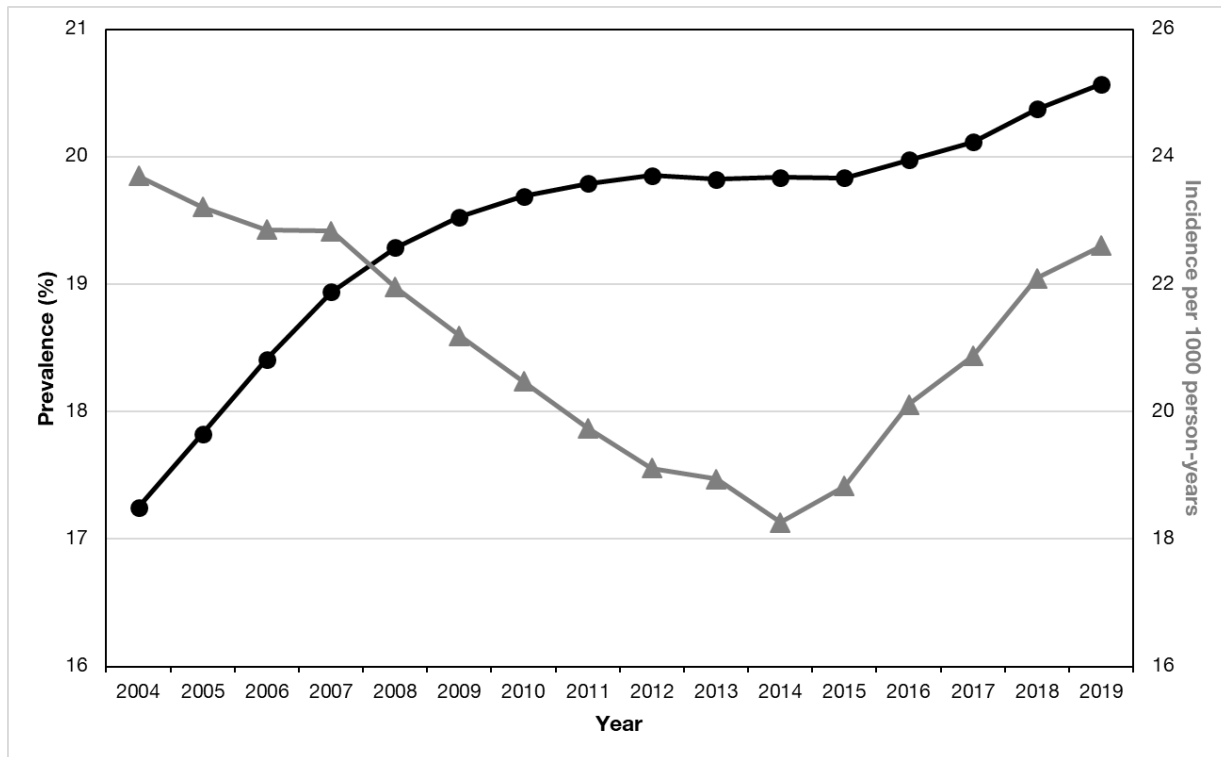

**Figure 1. Prevalence and incidence of antihypertensive drug use among residents of British Columbia aged 30–75 years between 2004 and 2019.** Prevalence was computed as the number of prevalent users of thiazides, angiotensin-converting enzyme inhibitors, angiotensin II receptor blockers, calcium channel blockers, or beta-blockers divided by the number of British Columbia residents aged 30–75 years during the calendar year. Incidence was computed as the number of incident users of the five antihypertensive drug classes per 1000 person-years of health plan enrollment among British Columbia residents aged 30–75 years during the calendar year. Prevalent use was defined as at least one of the five antihypertensive drug classes dispensed during the year. Incident use was defined as one of the five antihypertensive drug classes dispensed in the absence of a record for any antihypertensive drug dispensed in the five years prior (drug list available in Supplementary Table S1).



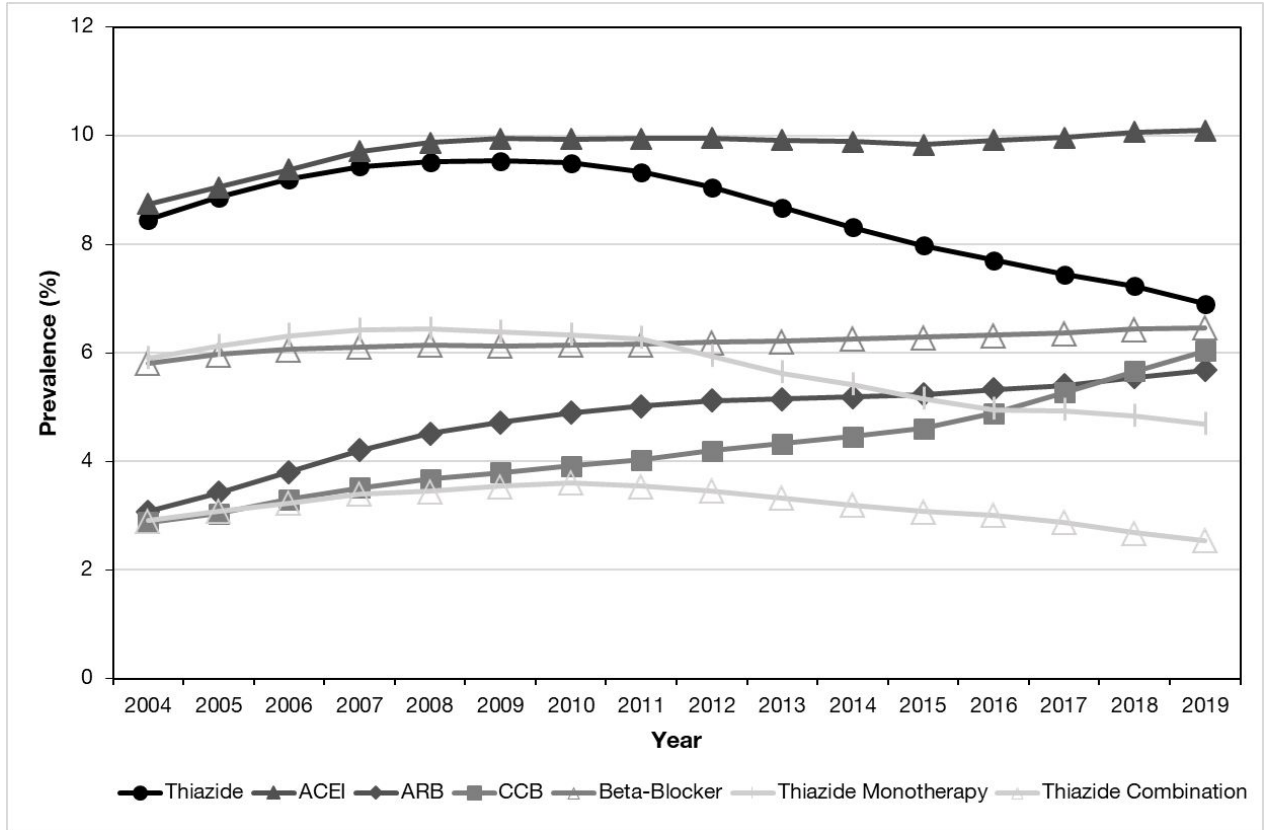

**Figure 2. Prevalence of antihypertensive drug use among residents of British Columbia aged 30–75 years between 2004 and 2019, by drug class.** Prevalence was computed as the number of prevalent users of an antihypertensive drug class divided by the number of British Columbia residents aged 30–75 years during the calendar year. *ACEI* Angiotensin-converting enzyme inhibitor; *ARB* angiotensin II receptor blocker; *CCB* calcium channel blocker.

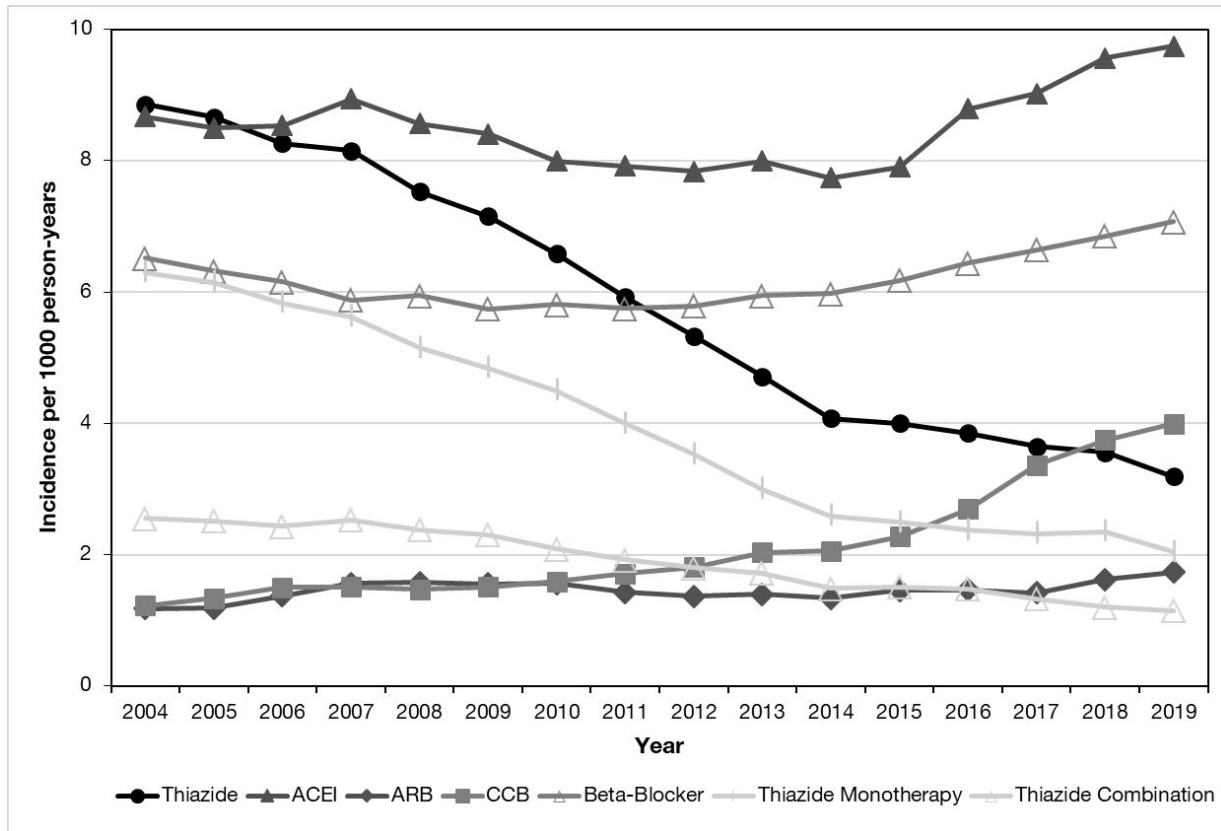

**Figure 3. Incidence of antihypertensive drug use among residents of British Columbia aged 30-75 years between 2004 and 2019, by drug class.** Incidence was computed as the number of incident users per 1000 person-years of health plan enrollment among British Columbia residents aged 30–75 years during the calendar year. Incident use was defined as one of the five antihypertensive drug classes dispensed in the absence of a record for any antihypertensive drug dispensed in the five years prior (drug list available in Supplementary Table S1). *ACEI* Angiotensin-converting enzyme inhibitor; *ARB* angiotensin II receptor blocker; *CCB* calcium channel blocker.

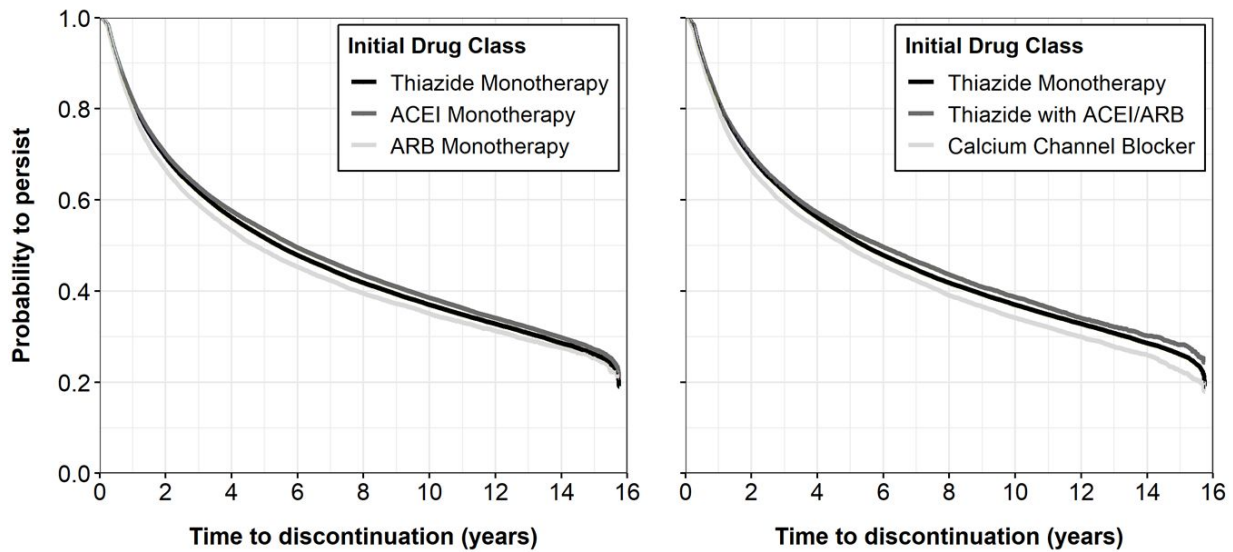

**Figure 4. Time to discontinuation of any antihypertensive therapy by initial drug class.**

Discontinuation was assigned using the refill-sequence model, where the first medication-free gap of 90 days for any antihypertensive drug was considered discontinuation of antihypertensive therapy (drug list available in Supplementary Table S1). The discontinuation date was defined as the expected date of the next prescription refill. Individuals were censored in the case of death, end of health plan enrollment, or end of follow-up. *ACEI* Angiotensin-converting enzyme inhibitor; *ARB* angiotensin II receptor blocker.

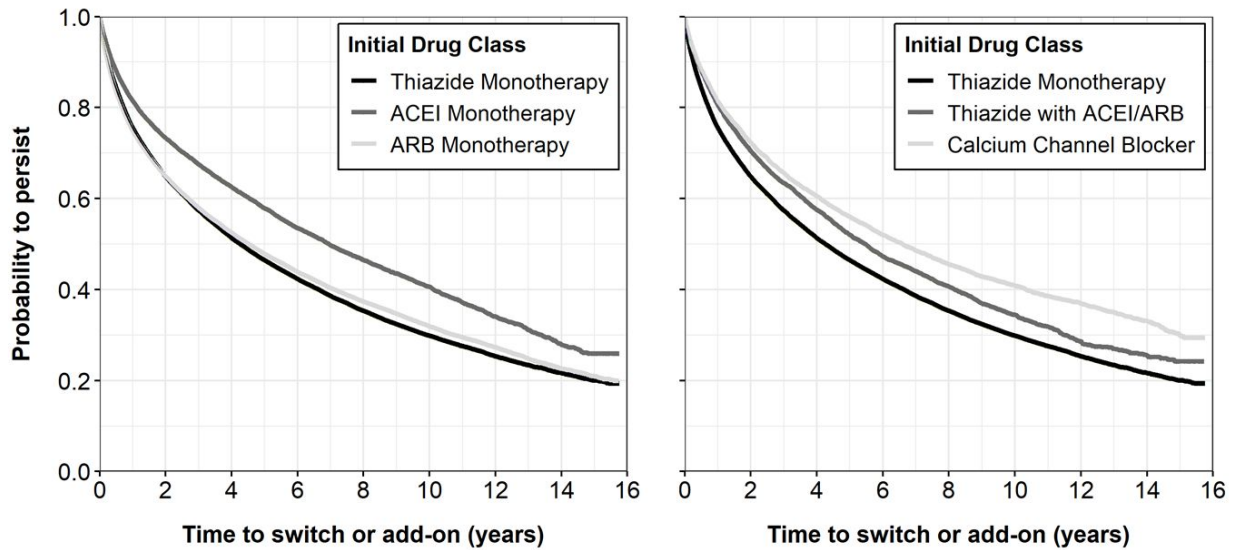

**Figure 5. Time to switch to or add-on of a different antihypertensive drug class by initial drug class.** Switch or add-on therapy was defined as the first dispensing of an antihypertensive drug class different from the initial drug class (drug list available in Supplementary Table S1). Switching from a combination product to its different components was not considered a switch or add-on event. Individuals were censored in the case of death, end of health plan enrollment, discontinuation of antihypertensive therapy, or end of follow-up. *ACEI* Angiotensin-converting enzyme inhibitor; *ARB* angiotensin II receptor blocker.

## REFERENCES

1. Weaver CG, Clement FM, Campbell NRC, James MT, Klarenbach SW, Hemmelgarn BR, et al. Healthcare Costs Attributable to Hypertension. *Hypertension*. 2015;66(3):502–8.
2. Rabi DM, McBrien KA, Sapir-Pichhadze R, Nakhla M, Ahmed SB, Dumanski SM, et al. Hypertension Canada’s 2020 Comprehensive Guidelines for the Prevention, Diagnosis, Risk Assessment, and Treatment of Hypertension in Adults and Children. *Can J Cardiol*. 2020;36(5):596–624.
3. Wright JM, Musini VM, Gill R. First-line drugs for hypertension. *Cochrane Db Syst Rev*. 2018;4(4):CD001841.
4. Whelton PK, Carey RM, Aronow WS, Casey DE, Collins KJ, Himmelfarb CD, et al. 2017 ACC/AHA/AAPA/ABC/ACPM/AGS/APhA/ASH/ASPC/NMA/PCNA Guideline for the Prevention, Detection, Evaluation, and Management of High Blood Pressure in Adults: Executive Summary A Report of the American College of Cardiology/American Heart Association Task Force on Clinical Practice Guidelines. *J Am Soc Hypertens*. 2018;12(8):579.e1-579.e73.
5. Williams B, Mancia G, Spiering W, Rosei EA, Azizi M, Burnier M, et al. 2018 ESC/ESH Guidelines for the management of arterial hypertension. *Eur Heart J*. 2018;39(33):3021–104.
6. Leung AA, Nerenberg K, Daskalopoulou SS, McBrien K, Zarnke KB, Dasgupta K, et al. Hypertension Canada’s 2016 Canadian Hypertension Education Program Guidelines for Blood

1  
2  
3 Pressure Measurement, Diagnosis, Assessment of Risk, Prevention, and Treatment of  
4 Hypertension. *Can J Cardiol.* 2016;32(5):569–88.  
5  
6

7  
8  
9 7. Ettehad D, Emdin CA, Kiran A, Anderson SG, Callender T, Emberson J, et al. Blood pressure  
10 lowering for prevention of cardiovascular disease and death: a systematic review and meta-  
11 analysis. *Lancet.* 2016;387(10022):957–67.  
12  
13  
14

15  
16  
17 8. Xie X, Atkins E, Lv J, Bennett A, Neal B, Ninomiya T, et al. Effects of intensive blood  
18 pressure lowering on cardiovascular and renal outcomes: updated systematic review and meta-  
19 analysis. *Lancet.* 2016;387(10017):435–43.  
20  
21  
22

23  
24  
25 9. Group SR, Wright JT, Williamson JD, Whelton PK, Snyder JK, Sink KM, et al. A  
26 Randomized Trial of Intensive versus Standard Blood-Pressure Control. *New Engl J Medicine.*  
27  
28 2015;373(22):2103–16.  
29  
30  
31

32  
33 10. Garies S, Hao S, McBrien K, Williamson T, Peng M, Khan NA, et al. Prevalence of  
34 Hypertension, Treatment, and Blood Pressure Targets in Canada Associated With the 2017  
35 American College of Cardiology and American Heart Association Blood Pressure Guidelines.  
36  
37  
38  
39  
40  
41  
42  
43  
44  
45  
46  
47  
48  
49  
50  
51  
52  
53  
54  
55  
56  
57  
58  
59  
60

11. Muntner P, Carey RM, Gidding S, Jones DW, Taler SJ, Wright JT, et al. Potential U.S.  
Population Impact of the 2017 ACC/AHA High Blood Pressure Guideline. *J Am Coll Cardiol.*  
2017;71(2):109–18.

- 1  
2  
3 12. Sundbøll J, Adelborg K, Mansfield KE, Tomlinson LA, Schmidt M. Seventeen-Year  
4 Nationwide Trends in Antihypertensive Drug Use in Denmark. *Am J Cardiol*.  
5  
6 2017;120(12):2193–200.  
7  
8  
9  
10  
11 13. Caetano PA, Lam JMC, Morgan SG. Toward a standard definition and measurement of  
12 persistence with drug therapy: Examples from research on statin and antihypertensive utilization.  
13  
14 *Clin Ther*. 2006;28(9):1411–24.  
15  
16  
17  
18  
19 14. Hamm NC, Pelletier L, Ellison J, Tennenhouse L, Reimer K, Paterson JM, et al. Trends in  
20 chronic disease incidence rates from the Canadian Chronic Disease Surveillance System. *Heal*  
21  
22 *Promot Chronic Dis Prev Can Res Policy Pract*. 2019;39(6–7):216–24.  
23  
24  
25  
26  
27 15. Johansen ME, Niforatos JD, Sussman JB. The Ecology of Antihypertensives in the United  
28 States, 1997–2017. *J Gen Intern Med*. 2021;36(3):699–704.  
29  
30  
31  
32  
33 16. Walker RL, Chen G, Campbell NRC, McAlister FA, Quan H, Tu K, et al. Canadian  
34 Provincial Trends in Antihypertensive Drug Prescriptions Between 1996 and 2006. *Can J*  
35  
36 *Cardiol*. 2011;27(4):461–7.  
37  
38  
39  
40  
41 17. Ellison DH, Loffing J. Thiazide Effects and Adverse Effects. *Hypertension*. 2009;54(2):196–  
42  
43 202.  
44  
45  
46  
47 18. Jamerson K, Weber MA, Bakris GL, Dahlöf B, Pitt B, Shi V, et al. Benazepril plus  
48 Amlodipine or Hydrochlorothiazide for Hypertension in High-Risk Patients. *New Engl J*  
49  
50 *Medicine*. 2008;359(23):2417–28.  
51  
52  
53  
54  
55  
56  
57  
58  
59  
60

- 1  
2  
3 19. Machado MA de Á, Moura CS, Wang Y, Danieli C, Abrahamowicz M, Bernatsky S, et al.  
4 Comparative effectiveness of antihypertensive drugs in nondiabetic patients with hypertension:  
5 A population-based study. *J Clin Hypertens*. 2017;19(10):999–1009.  
6  
7  
8  
9  
10  
11 20. Suchard MA, Schuemie MJ, Krumholz HM, You SC, Chen R, Pratt N, et al. Comprehensive  
12 comparative effectiveness and safety of first-line antihypertensive drug classes: a systematic,  
13 multinational, large-scale analysis. *Lancet*. 2019;394(10211):1816–26.  
14  
15  
16  
17  
18  
19 21. Pottegård A, Hallas J, Olesen M, Svendsen MT, Habel LA, Friedman GD, et al.  
20 Hydrochlorothiazide use is strongly associated with risk of lip cancer. *J Intern Med*.  
21 2017;282(4):322–31.  
22  
23  
24  
25  
26  
27 22. Pedersen SA, Gaist D, Schmidt SAJ, Hölmich LR, Friis S, Pottegård A. Hydrochlorothiazide  
28 use and risk of nonmelanoma skin cancer: A nationwide case-control study from Denmark. *J Am*  
29 *Acad Dermatol*. 2018;78(4):673-681.e9.  
30  
31  
32  
33  
34  
35 23. Pottegård A, Pedersen SA, Schmidt SAJ, Hölmich LR, Friis S, Gaist D. Association of  
36 Hydrochlorothiazide Use and Risk of Malignant Melanoma. *Jama Intern Med*.  
37 2018;178(8):1120.  
38  
39  
40  
41  
42  
43 24. Pottegård A, Bech BH, Pedersen SA, Christensen B. Use of hydrochlorothiazide in Denmark  
44 following publication of skin cancer risk findings. *Pharmacoepidem Dr S*. 2021;  
45  
46  
47  
48  
49 25. Roush GC, Ernst ME, Kostis JB, Tandon S, Sica DA. Head-to-Head Comparisons of  
50 Hydrochlorothiazide With Indapamide and Chlorthalidone. *Hypertension*. 2015;65(5):1041–6.  
51  
52  
53  
54  
55  
56  
57  
58  
59  
60



- 1  
2  
3 26. Pareek AK, Messerli FH, Chandurkar NB, Dharmadhikari SK, Godbole AV, Kshirsagar PP,  
4  
5 et al. Efficacy of Low-Dose Chlorthalidone and Hydrochlorothiazide as Assessed by 24-  
6  
7 h Ambulatory Blood Pressure Monitoring. *J Am Coll Cardiol*. 2016;67(4):379–89.  
8  
9  
10  
11 27. Engberink RHGO, Frenkel WJ, Bogaard B van den, Brewster LM, Vogt L, Born B-JH van  
12  
13 den. Effects of thiazide-type and thiazide-like diuretics on cardiovascular events and mortality:  
14  
15 systematic review and meta-analysis. *Hypertens Dallas Tex 1979*. 2015;65(5):1033–40.  
16  
17  
18  
19 28. Bourgault C, Sénécal M, Brisson M, Marentette MA, Grégoire J-P. Persistence and  
20  
21 discontinuation patterns of antihypertensive therapy among newly treated patients: a population-  
22  
23 based study. *J Hum Hypertens*. 2005;19(8):607–13.  
24  
25  
26  
27 29. Burke TA, Sturkenboom MC, Lu S, Wentworth CE, Lin Y, Rhoads GG. Discontinuation of  
28  
29 antihypertensive drugs among newly diagnosed hypertensive patients in UK general practice. *J*  
30  
31 *Hypertens*. 2006;24(6):1193–200.  
32  
33  
34  
35 30. Grégoire J-P, Moisan J, Guibert R, Ciampi A, Milot A, Gaudet M, et al. Determinants of  
36  
37 discontinuation of new courses of antihypertensive medications. *J Clin Epidemiol*.  
38  
39 2002;55(7):728–35.  
40  
41  
42  
43 31. Abraham HMA, White CM, White WB. The Comparative Efficacy and Safety of the  
44  
45 Angiotensin Receptor Blockers in the Management of Hypertension and Other Cardiovascular  
46  
47 Diseases. *Drug Safety*. 2015;38(1):33–54.  
48  
49  
50  
51  
52  
53  
54  
55  
56  
57  
58  
59  
60

- 1  
2  
3 32. Laan DM van der, Elders PJM, Boons CCLM, Beckeringh JJ, Nijpels G, Hugtenburg JG.  
4  
5 Factors associated with antihypertensive medication non-adherence: a systematic review. *J Hum*  
6  
7 *Hypertens.* 2017;31(11):687–94.  
8  
9  
10  
11 33. Tu Y-K, Gunnell D, Gilthorpe MS. Simpson’s Paradox, Lord’s Paradox, and Suppression  
12  
13 Effects are the same phenomenon – the reversal paradox. *Emerg Themes Epidemiology.*  
14  
15 2008;5(1):2–2.  
16  
17  
18  
19 34. Quinn AE, Ronksley PE, Bresee L, Au F, Wick J, Leung AA, et al. Antihypertensive  
20  
21 Prescribing for Uncomplicated, Incident Hypertension: Opportunities for Cost Savings. *Cjc*  
22  
23 *Open.* 2021;3(6):703–13.  
24  
25  
26  
27 35. Ma J, Lee K-V, Stafford RS. Changes in Antihypertensive Prescribing During US Outpatient  
28  
29 Visits for Uncomplicated Hypertension Between 1993 and 2004. *Hypertension.* 2006;48(5):846–  
30  
31 52.  
32  
33  
34  
35 36. Mancia G, Grassi G. Individualization of Antihypertensive Drug Treatment. *Diabetes Care.*  
36  
37 2013;36(Supplement\_2):S301–6.  
38  
39  
40  
41  
42  
43  
44  
45  
46  
47  
48  
49  
50  
51  
52  
53  
54  
55  
56  
57  
58  
59  
60

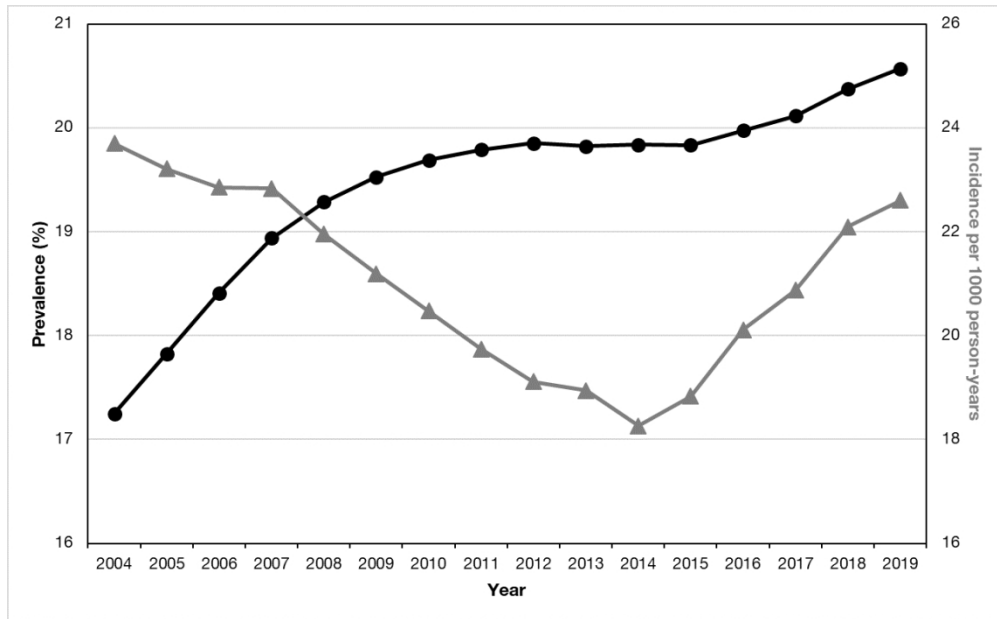

Figure 1. Prevalence and incidence of antihypertensive drug use among residents of British Columbia aged 30–75 years between 2004 and 2019. Prevalence was computed as the number of prevalent users of thiazides, angiotensin-converting enzyme inhibitors, angiotensin II receptor blockers, calcium channel blockers, or beta-blockers divided by the number of British Columbia residents aged 30–75 years during the calendar year. Incidence was computed as the number of incident users of the five antihypertensive drug classes per 1000 person-years of health plan enrollment among British Columbia residents aged 30–75 years during the calendar year. Prevalent use was defined as at least one of the five antihypertensive drug classes dispensed during the year. Incident use was defined as one of the five antihypertensive drug classes dispensed in the absence of a record for any antihypertensive drug dispensed in the five years prior (drug list available in Supplementary Table S1).

220x135mm (150 x 150 DPI)

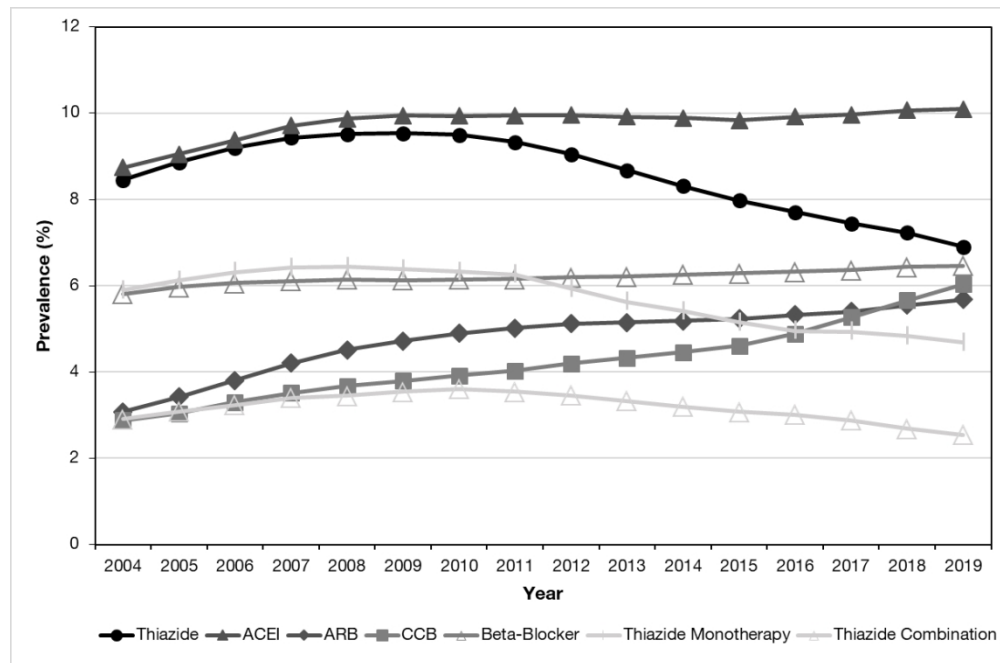

Figure 2. Prevalence of antihypertensive drug use among residents of British Columbia aged 30–75 years between 2004 and 2019, by drug class. Prevalence was computed as the number of prevalent users of an antihypertensive drug class divided by the number of British Columbia residents aged 30–75 years during the calendar year. ACEI Angiotensin-converting enzyme inhibitor; ARB angiotensin II receptor blocker; CCB calcium channel blocker.

210x139mm (150 x 150 DPI)

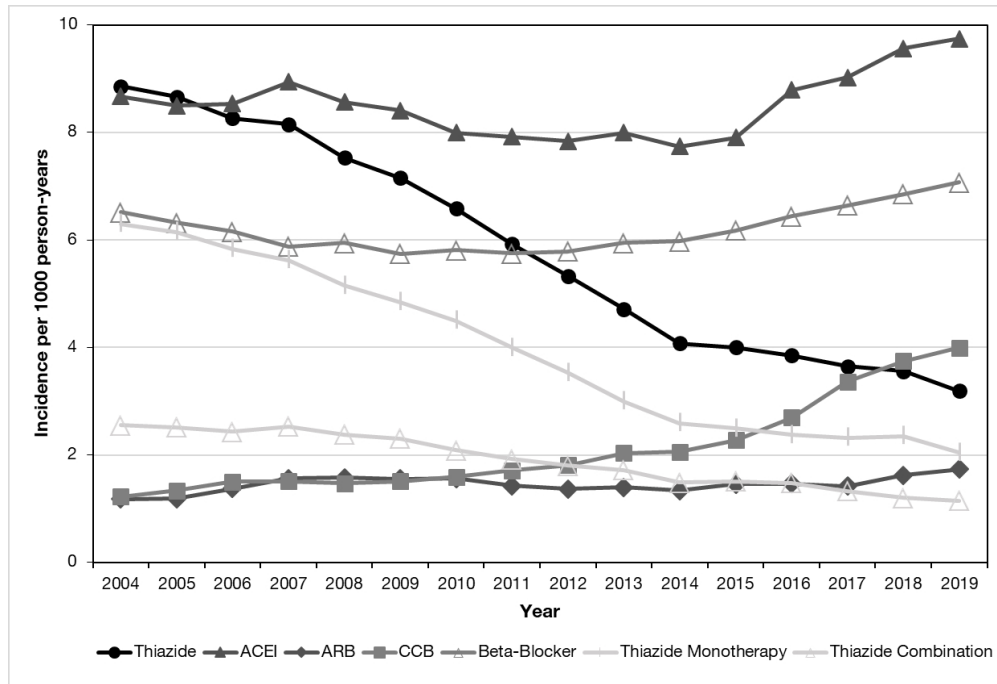

Figure 3. Incidence of antihypertensive drug use among residents of British Columbia aged 30-75 years between 2004 and 2019, by drug class. Incidence was computed as the number of incident users per 1000 person-years of health plan enrollment among British Columbia residents aged 30-75 years during the calendar year. Incident use was defined as one of the five antihypertensive drug classes dispensed in the absence of a record for any antihypertensive drug dispensed in the five years prior (drug list available in Supplementary Table S1). ACEI Angiotensin-converting enzyme inhibitor; ARB angiotensin II receptor blocker; CCB calcium channel blocker.

210x142mm (150 x 150 DPI)

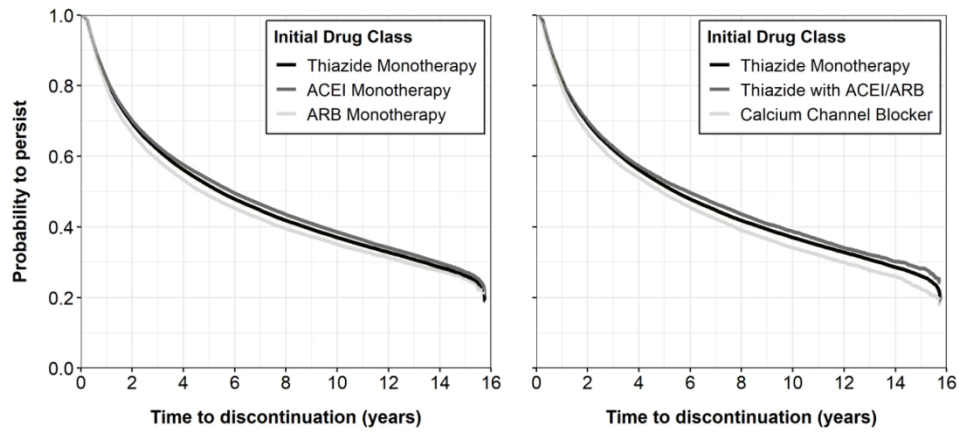

Figure 4. Time to discontinuation of any antihypertensive therapy by initial drug class. Discontinuation was assigned using the refill-sequence model, where the first medication-free gap of 90 days for any antihypertensive drug was considered discontinuation of antihypertensive therapy (drug list available in Supplementary Table S1). The discontinuation date was defined as the expected date of the next prescription refill. Individuals were censored in the case of death, end of health plan enrollment, or end of follow-up. ACEI Angiotensin-converting enzyme inhibitor; ARB angiotensin II receptor blocker.

239x114mm (150 x 150 DPI)

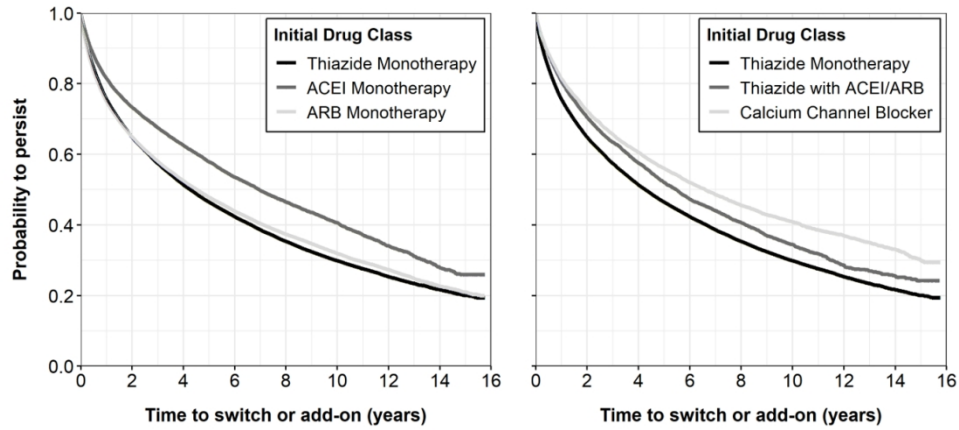

Figure 5. Time to switch to or add-on of a different antihypertensive drug class by initial drug class. Switch or add-on therapy was defined as the first dispensing of an antihypertensive drug class different from the initial drug class (drug list available in Supplementary Table S1). Switching from a combination product to its different components was not considered a switch or add-on event. Individuals were censored in the case of death, end of health plan enrollment, discontinuation of antihypertensive therapy, or end of follow-up. ACEI Angiotensin-converting enzyme inhibitor; ARB angiotensin II receptor blocker.

239x114mm (150 x 150 DPI)

**Table 1. Discontinuation of any antihypertensive therapy in the incident user cohort.**

| Initial Drug Class                      | Discontinued<br>n (%) | Censored<br>n (%) | Median<br>(years)    | Crude HR<br>(95% CI) | Adjusted HR<br>(95% CI)* |
|-----------------------------------------|-----------------------|-------------------|----------------------|----------------------|--------------------------|
| Thiazide<br>Monotherapy<br>n = 86,008   | 55,728 (64.8)         | 30,280<br>(35.2)  | 5.42 (5.33-<br>5.51) | Reference            | Reference                |
| ACEI Monotherapy<br>n = 100,670         | 61,838 (61.4)         | 38,832<br>(38.6)  | 5.89 (5.81-<br>5.97) | 0.96 (0.95-<br>0.97) | 0.96 (0.95-<br>0.97)     |
| ARB Monotherapy<br>n = 11,449           | 7423 (64.8)           | 4026 (35.2)       | 4.72 (4.48-<br>4.95) | 1.07 (1.04-<br>1.09) | 1.06 (1.03-<br>1.08)     |
| Thiazide with<br>ACEI/ARB<br>n = 18,909 | 11,525 (60.9)         | 7384 (39.1)       | 5.93 (5.70-<br>6.13) | 0.96 (0.94-<br>0.98) | 0.96 (0.94-<br>0.98)     |
| CCB<br>n = 15,745                       | 10,085 (64.1)         | 5660 (36.0)       | 4.87 (4.71-<br>5.05) | 1.08 (1.06-<br>1.11) | 1.06 (1.04-<br>1.09)     |

*HR* Hazard ratio; *CI* confidence interval; *ACEI* angiotensin-converting enzyme inhibitor; *ARB* angiotensin II receptor blocker; *CCB* calcium channel blocker.

\* Adjusted for age, sex, income level, geographical area.



**Table 2. Switch to or add-on of a different antihypertensive drug class in the incident user cohort.**

| Initial Drug Class                   | Switched or Added<br>n (%) | Censored<br>n (%) | Median<br>(years) | Crude HR<br>(95% CI) | Adjusted HR<br>(95% CI)* |
|--------------------------------------|----------------------------|-------------------|-------------------|----------------------|--------------------------|
| Thiazide Monotherapy<br>n = 75,214   | 39,992 (53.2)              | 35,222 (46.8)     | 4.26 (4.18-4.35)  | Reference            | Reference                |
| ACEI Monotherapy<br>n = 89,500       | 44,254 (49.4)              | 45,246 (50.6)     | 4.53 (4.45-4.62)  | 0.98 (0.96-0.99)     | 0.93 (0.92-0.95)         |
| ARB Monotherapy<br>n = 10,763        | 4781 (44.4)                | 5982 (55.6)       | 5.48 (5.21-5.67)  | 0.84 (0.82-0.87)     | 0.82 (0.80-0.85)         |
| Thiazide with ACEI/ARB<br>n = 17,469 | 7184 (41.1)                | 10,285 (58.9)     | 6.95 (6.75-7.21)  | 0.74 (0.72-0.76)     | 0.71 (0.69-0.73)         |
| CCB<br>n = 14,925                    | 6338 (42.5)                | 8587 (57.5)       | 6.59 (6.32-6.92)  | 0.75 (0.73-0.77)     | 0.74 (0.72-0.76)         |

*HR* Hazard ratio; *CI* confidence interval; *ACEI* angiotensin-converting enzyme inhibitor; *ARB* angiotensin II receptor blocker; *CCB* calcium channel blocker.

\* Adjusted for age, sex, income level, geographical area.

# Trends in Antihypertensive Drug Utilization in British Columbia, 2004–2019

## Supplementary File

### Table of Contents

*Supplementary Tables* .....2

Table S1. List of antihypertensive medications dispensed in British Columbia. ....2

Table S2. List of diagnosis and procedure codes used to identify conditions .....5

Table S3. Covariate definitions .....7

Table S4. Patient flow .....8

Table S5. Discontinuation of any antihypertensive therapy in the incident user cohort by  
PharmaCare coverage .....9

*Supplementary Figures* .....10

Figure S1. Percentage of incident thiazide users between 2004 and 2019. ....10

## Supplementary Tables

**Table S1. List of antihypertensive medications dispensed in British Columbia.**

| Therapeutic Group | ATC Code                                      | Generic Name                   |
|-------------------|-----------------------------------------------|--------------------------------|
| Thiazide diuretic | C02LA01                                       | reserpine/hydrochlorothiazide  |
|                   | C02LA01                                       | hydralazine/reserpin/hcthiazid |
|                   | C02LB01                                       | methyldopa/hydrochlorothiazide |
|                   | C02LC01                                       | clonidine hcl/chlorthalidone   |
|                   | C03AA03                                       | hydrochlorothiazide            |
|                   | C03BA04                                       | chlorthalidone                 |
|                   | C03BA08                                       | metolazone                     |
|                   | C03BA11                                       | indapamide                     |
|                   | C03EA01                                       | spironolact/hydrochlorothiazid |
|                   | C03EA01                                       | amiloride/hydrochlorothiazide  |
|                   | C03EA01                                       | triamterene/hydrochlorothiazid |
|                   | C07BA05                                       | propranolol/hydrochlorothiazid |
|                   | C07BA06                                       | timolol/hydrochlorothiazide    |
|                   | C07CA03                                       | pindolol/hydrochlorothiazide   |
|                   | C07CB03                                       | atenolol/chlorthalidone        |
|                   | C09BA02                                       | enalapril/hydrochlorothiazide  |
|                   | C09BA03                                       | lisinopril/hydrochlorothiazide |
|                   | C09BA04                                       | perindopril arg/indapamide     |
|                   | C09BA04                                       | perindopril erbumin/indapamide |
|                   | C09BA05                                       | ramipril/hydrochlorothiazide   |
|                   | C09BA06                                       | quinapril/hydrochlorothiazide  |
|                   | C09BA08                                       | cilazapril/hydrochlorothiazide |
|                   | C09DA01                                       | losartan/hydrochlorothiazide   |
|                   | C09DA02                                       | eprosartan/hydrochlorothiazide |
|                   | C09DA03                                       | valsartan/hydrochlorothiazide  |
|                   | C09DA04                                       | irbesartan/hydrochlorothiazide |
|                   | C09DA06                                       | candesartan/hydrochlorothiazid |
|                   | C09DA07                                       | telmisartan/hydrochlorothiazid |
|                   | C09DA08                                       | olmesartan/hydrochlorothiazide |
|                   | C09DA09                                       | azilsartan med/chlorthalidone  |
|                   | C09XA52                                       | aliskiren/hydrochlorothiazide  |
|                   | Angiotensin-converting enzyme (ACE) inhibitor | C09AA01                        |
| C09AA02           |                                               | enalapril sodium               |
| C09AA02           |                                               | enalapril maleate              |
| C09AA03           |                                               | lisinopril                     |
| C09AA04           |                                               | perindopril erbumine           |
| C09AA05           |                                               | ramipril                       |

1  
2  
3  
4  
5  
6  
7  
8  
9  
10  
11  
12  
13  
14  
15  
16  
17  
18  
19  
20  
21  
22  
23  
24  
25  
26  
27  
28  
29  
30  
31  
32  
33  
34  
35  
36  
37  
38  
39  
40  
41  
42  
43  
44  
45  
46  
47  
48  
49  
50  
51  
52  
53  
54  
55  
56  
57  
58  
59  
60

|                              |         |                                |
|------------------------------|---------|--------------------------------|
|                              | C09AA06 | quinapril hcl                  |
|                              | C09AA07 | benazepril hcl                 |
|                              | C09AA08 | cilazapril                     |
|                              | C09AA09 | fosinopril sodium              |
|                              | C09AA10 | trandolapril                   |
|                              | C09BA02 | enalapril/hydrochlorothiazide  |
|                              | C09BA03 | lisinopril/hydrochlorothiazide |
|                              | C09BA04 | perindopril erbumin/indapamide |
|                              | C09BA04 | perindopril arg/indapamide     |
|                              | C09BA05 | ramipril/hydrochlorothiazide   |
|                              | C09BA06 | quinapril/hydrochlorothiazide  |
|                              | C09BA08 | cilazapril/hydrochlorothiazide |
|                              | C09BB04 | perindopril arg/amlodipine bes |
|                              | C09BB10 | trandolapril/verapamil hcl     |
| Angiotensin receptor blocker | C09CA01 | losartan potassium             |
|                              | C09CA02 | eprosartan mesylate            |
|                              | C09CA03 | valsartan                      |
|                              | C09CA04 | irbesartan                     |
|                              | C09CA06 | candesartan cilexetil          |
|                              | C09CA07 | telmisartan                    |
|                              | C09CA08 | olmesartan medoxomil           |
|                              | C09CA09 | azilsartan medoxomil           |
|                              | C09DA01 | losartan/hydrochlorothiazide   |
|                              | C09DA02 | eprosartan/hydrochlorothiazide |
|                              | C09DA03 | valsartan/hydrochlorothiazide  |
|                              | C09DA04 | irbesartan/hydrochlorothiazide |
|                              | C09DA06 | candesartan/hydrochlorothiazid |
|                              | C09DA07 | telmisartan/hydrochlorothiazid |
|                              | C09DA08 | olmesartan/hydrochlorothiazide |
|                              | C09DA09 | azilsartan med/chlorthalidone  |
|                              | C09DB04 | telmisartan/amlodipine         |
|                              | C09DX04 | sacubitril/valsartan           |
| Calcium Channel Blocker      | C08CA01 | amlodipine besylate            |
|                              | C08CA02 | felodipine                     |
|                              | C08CA05 | nifedipine                     |
|                              | C08CA55 | nifedipine/acetylsalicylic ac  |
|                              | C09BB04 | perindopril arg/amlodipine bes |
|                              | C09DB04 | telmisartan/amlodipine         |
|                              | C10BX03 | amlodipine/atorvastatin        |
| Potassium-sparing diuretic   | C03DA01 | spironolactone                 |
|                              | C03DB01 | amiloride hcl                  |
|                              | C03DB02 | triamterene                    |
|                              | C03EA01 | amiloride/hydrochlorothiazide  |

|               |         |                                |
|---------------|---------|--------------------------------|
|               | C03EA01 | triamterene/hydrochlorothiazid |
|               | C03EA01 | spironolact/hydrochlorothiazid |
| Loop diuretic | C03CA01 | furosemide                     |
|               | C03CA02 | bumetanide                     |
| Beta-blocker  | C07AA03 | pindolol                       |
|               | C07AA05 | propranolol hcl                |
|               | C07AA06 | timolol maleate                |
|               | C07AA12 | nadolol                        |
|               | C07AB02 | metoprolol tartrate            |
|               | C07AB03 | atenolol                       |
|               | C07AB07 | bisoprolol fumarate            |
|               | C07AB12 | nebivolol hcl                  |
|               | C07AG01 | labetalol hcl                  |
|               | C07BA05 | propranolol/hydrochlorothiazid |
|               | C07BA06 | timolol/hydrochlorothiazide    |
|               | C07BA12 | nadolol/bendroflumethiazide    |
|               | C07CA03 | pindolol/hydrochlorothiazide   |
|               | C07CB03 | atenolol/chlorthalidone        |
| Other         | C02AA02 | reserpine                      |
|               | C02AB02 | methyldopa                     |
|               | C02AC01 | clonidine hcl                  |
|               | C02AC02 | guanfacine hcl                 |
|               | C02CA01 | prazosin hcl                   |
|               | C02CA04 | doxazosin mesylate             |
|               | C02DB02 | hydralazine hcl                |
|               | C02DC01 | minoxidil                      |
|               | C02LA01 | reserpine/hydrochlorothiazide  |
|               | C02LA01 | hydralazine/reserpin/hcthiazid |
|               | C02LB01 | methyldopa/hydrochlorothiazide |
|               | C02LB01 | methyldopa/chlorothiazide      |
|               | C02LC01 | clonidine hcl/chlorthalidone   |
|               | C03DA01 | spironolactone                 |
|               | C08DA01 | verapamil hcl                  |
|               | C08DB01 | diltiazem hcl                  |
|               | C09BB10 | trandolapril/verapamil hcl     |
|               | C09XA02 | aliskiren fumarate             |
|               | C09XA52 | aliskiren/hydrochlorothiazide  |
|               | G04CA03 | terazosin hcl                  |
|               | N02CX02 | clonidine hcl                  |

ATC Anatomical Therapeutic Chemical.

1  
2  
3  
4  
5  
6  
7  
8  
9  
10  
11  
12  
13  
14  
15  
16  
17  
18  
19  
20  
21  
22  
23  
24  
25  
26  
27  
28  
29  
30  
31  
32  
33  
34  
35  
36  
37  
38  
39  
40  
41  
42  
43  
44  
45  
46  
47

**Table S2. List of diagnosis and procedure codes used to identify conditions**

| Condition                                       | Diagnosis Codes                                      |                                                                                                                                                               | Procedure Codes                                                |                                                                                                                              |                                                               |
|-------------------------------------------------|------------------------------------------------------|---------------------------------------------------------------------------------------------------------------------------------------------------------------|----------------------------------------------------------------|------------------------------------------------------------------------------------------------------------------------------|---------------------------------------------------------------|
|                                                 | ICD-9                                                | ICD-10                                                                                                                                                        | CCP                                                            | CCI                                                                                                                          | MSP fee Items                                                 |
| Cancer                                          | 140-209, V58.0, V58.1                                | C00-C97, Z51.0, Z51.1, Z51.2                                                                                                                                  | 06.2 (radiotherapy), 06.3 (radiotherapy), 13.55 (chemotherapy) | X.XX.35.XX-G6 (chemotherapy), X.XX.35.XX-M0 to X.XX.35.XX-M9 (chemotherapy), X.XX.27 (radiotherapy), X.XX.26 (brachytherapy) | 33581, 33582, 33583 (chemotherapy)                            |
| Renal failure                                   | 584-586                                              | N17-N19                                                                                                                                                       | -                                                              | -                                                                                                                            | -                                                             |
| Dialysis (peritoneal or hemodialysis)           | V45.1, V56.0, V56.8, E870.2, E871.2, E872.2, E874.2  | E10.220-E10.224, E10.229, E11.220-E11.224, E11.229, E13.220-E13.224, E13.229, E14.220-E14.224, E14.229, T82.4, Y60.2, Y61.2, Y62.2, Y84.1, Z49.0-Z49.2, Z99.2 | 51.27, 51.42, 51.43, 51.95, 66.98                              | 1PZ21HPD4, 1PZ21HQBR, 1PZ21HQBS                                                                                              | 33750, 33751, 33752, 33708, 33756, 33758, 33723, 33759, 33761 |
| Diseases associated with secondary hypertension | 194.0, 227.0, 237.3, 255.1, 255.6, 405, 447.3, 447.8 | C74.1, C75.5, D13.2, D35.0, D44.6, D44.7, E26, E27.5, I15, I77.3,                                                                                             | -                                                              | -                                                                                                                            | -                                                             |
| Congestive heart failure                        | 428                                                  | I50                                                                                                                                                           | -                                                              | -                                                                                                                            | -                                                             |
| Coronary artery disease                         | 410.x-414.x                                          | I20.x-I25.x                                                                                                                                                   | 48.0, 48.1, 48.2                                               | 1.IJ.76, 1.IJ.50                                                                                                             | 07908, 0790, 07990, 00839, 00840, 00842, 00841                |
| Cirrhosis and liver disease                     | 570-573                                              | K70-K75                                                                                                                                                       | -                                                              | -                                                                                                                            | -                                                             |

| Condition                      | Diagnosis Codes  |                                          | Procedure Codes                             |                                    |               |
|--------------------------------|------------------|------------------------------------------|---------------------------------------------|------------------------------------|---------------|
|                                | ICD-9            | ICD-10                                   | CCP                                         | CCI                                | MSP fee Items |
| Toxemia of pregnancy           | 642.5-642.7      | O11, O14-O15                             | -                                           | -                                  | -             |
| Premenstrual tension and edema | 625.4            | N94.3                                    | -                                           | -                                  | -             |
| Nephrotic syndrome             | 581              | N04                                      | -                                           | -                                  | -             |
| Kidney stones                  | 593-594          | N20-N23                                  | 68.0, 68.2, 67.01, 69.0, 69.13, 70.5, 71.96 | 1.PG.59, 1.PE.59, 1.PL.59, 1.PM.59 |               |
| Hypercalcemia                  | 275.42           | E83.52                                   | -                                           | -                                  | -             |
| Diabetes Insipidus             | 253.5, 588.1     | E23.2, N25.1                             | -                                           | -                                  | -             |
| Migraine                       | 346              | G43                                      | -                                           | -                                  | -             |
| Diabetic nephropathy           | 249.4, 250.4     | E10.2, E10.7, E11.2, E11.7, E14.2, E14.7 | -                                           | -                                  | -             |
| Other chronic kidney diseases  | 580-589, 590-593 | N00-N20, N25-N29                         | -                                           | -                                  | -             |
| Marfan syndrome                | 759.82           | Q87.4                                    | -                                           | -                                  | -             |

*ICD* International Classification of Disease; *CCP* Canadian Classification of Diagnostic, Therapeutic, and Surgical Procedures; *CCI* Canadian Classification of Health Interventions; *MSP* Medical Services Plan.

**Table S3. Covariate definitions**

| Covariate         | Definition                                                                                                                                                                 |
|-------------------|----------------------------------------------------------------------------------------------------------------------------------------------------------------------------|
| Age               | Age at initiation of antihypertensive therapy [discrete]                                                                                                                   |
| Sex               | Based on provincial health insurance registry data [female; male]                                                                                                          |
| Income level      | Any prescription drug claim paid by an assisted basic or senior \$0 deductible plan or social services plan in the 1 year before cohort entry.<br>[assisted; not assisted] |
| Geographical area | Based on forward sortation area of individuals' residence in British Columbia<br>[north; east; central; west-rural; west-urban]                                            |

Confidential



**Table S4. Patient flow**

|                                                                                                                      | No. of individuals remaining | No. of individuals excluded | % Excluded |
|----------------------------------------------------------------------------------------------------------------------|------------------------------|-----------------------------|------------|
| <b>Source population</b>                                                                                             | 5,669,128                    |                             |            |
| Individuals with a new prescription for a thiazide, ACEI, ARB, or CCB between January 1, 2004 and December 31, 2014. | 502,743                      |                             |            |
| <b>Exclusion criteria</b>                                                                                            |                              |                             |            |
| Lack of continuous enrollment in the 2 years before cohort entry                                                     | 430,415                      | 72,328                      | 14.4       |
| Lost MSP enrollment within the first 3 months of the initial prescription                                            | 429,697                      | 718                         | 0.1        |
| Missing information on age or sex                                                                                    | 429,677                      | 20                          | 0.0        |
| Age under 30 or over 75 on date of the initial prescription                                                          | 373,364                      | 56,313                      | 11.2       |
| Died before cohort entry                                                                                             | 373,347                      | 17                          | 0.0        |
| Dispensed both ACEI and ARB on date of the initial prescription                                                      | 373,301                      | 46                          | 0.0        |
| Cancer                                                                                                               | 303,741                      | 69,560                      | 13.8       |
| Renal failure or dialysis                                                                                            | 298,430                      | 5,311                       | 1.1        |
| Secondary hypertension                                                                                               | 297,622                      | 808                         | 0.2        |
| Heart failure                                                                                                        | 291,821                      | 5,801                       | 1.2        |
| Coronary artery disease                                                                                              | 264,202                      | 27,619                      | 5.5        |
| Edema-causing conditions (except steroid use)                                                                        | 261,098                      | 3,104                       | 0.6        |
| Steroid use                                                                                                          | 255,881                      | 5,217                       | 1.0        |
| Kidney stones or hypercalcemia                                                                                       | 254,400                      | 1,481                       | 0.3        |
| Diabetes Insipidus                                                                                                   | 254,380                      | 20                          | 0.0        |
| Migraine                                                                                                             | 250,854                      | 3,526                       | 0.7        |
| Diabetic nephropathy                                                                                                 | 250,641                      | 213                         | 0.0        |
| Other chronic kidney diseases                                                                                        | 248,539                      | 2,102                       | 0.4        |
| Marfan syndrome                                                                                                      | 248,533                      | 6                           | 0.0        |
| Discontinued any antihypertensive therapy within the first 3 months of the initial prescription                      | 232,781                      | 15,752                      | 3.1        |
| <b>Final Cohort</b>                                                                                                  | <b>232,781</b>               |                             |            |

**Table S5. Discontinuation of any antihypertensive therapy in the incident user cohort by PharmaCare coverage**

| PharmaCare Coverage                 |                    |                |                  |                   |                       |
|-------------------------------------|--------------------|----------------|------------------|-------------------|-----------------------|
| Initial Drug Class                  | Discontinued n (%) | Censored n (%) | Median (years)   | Crude HR (95% CI) | Adjusted HR (95% CI)* |
| Thiazide Monotherapy, n = 84,897    | 54,972 (64.7)      | 29,925 (35.2)  | 5.44 (5.35-5.53) | Reference         | Reference             |
| ACEI Monotherapy, n = 98,157        | 59,881 (61.0)      | 38,276 (39.0)  | 6.05 (5.96-6.14) | 0.95 (0.94-0.96)  | 0.95 (0.93-0.96)      |
| ARB Monotherapy, n = 1002           | 635 (63.4)         | 367 (36.6)     | 5.78 (5.20-6.77) | 0.98 (0.91-1.06)  | 0.98 (0.91-1.06)      |
| Thiazide with ACEI/ARB, n = 10,957  | 6560 (59.8)        | 4397 (40.1)    | 6.44 (6.15-6.75) | 0.92 (0.90-0.95)  | 0.92 (0.90-0.95)      |
| Calcium Channel Blocker, n = 14,510 | 9198 (63.4)        | 5312 (36.6)    | 5.08 (4.91-5.30) | 1.06 (1.04-1.08)  | 1.04 (1.02-1.06)      |
| Without PharmaCare Coverage         |                    |                |                  |                   |                       |
| Initial Drug Class                  | Discontinued n (%) | Censored n (%) | Median (years)   | Crude HR (95% CI) | Adjusted HR (95% CI)* |
| Thiazide Monotherapy, n = 1111      | 756 (68.0)         | 355 (32.0)     | 4.21 (3.76-4.88) | Reference         | Reference             |
| ACEI Monotherapy, n = 2513          | 1957 (77.9)        | 556 (22.1)     | 1.79 (1.63-1.92) | 1.50 (1.37-1.63)  | 1.47 (1.35-1.60)      |
| ARB Monotherapy, n = 10,447         | 6788 (65.0)        | 3659 (35.0)    | 4.61 (4.37-4.85) | 0.91 (0.84-0.98)  | 0.91 (0.84-0.98)      |
| Thiazide with ACEI/ARB, n = 7952    | 4965 (62.4)        | 2987 (37.6)    | 5.24 (4.94-5.59) | 0.86 (0.80-0.93)  | 0.87 (0.81-0.94)      |
| Calcium Channel Blocker, n = 1235   | 887 (71.8)         | 348 (28.2)     | 2.69 (2.36-3.10) | 1.24 (1.12-1.36)  | 1.21 (1.09-1.33)      |

ACEI Angiotensin-converting enzyme inhibitor; ARB angiotensin II receptor blocker.

\* Adjusted for age, sex, income level, geographical area.

## Supplementary Figures

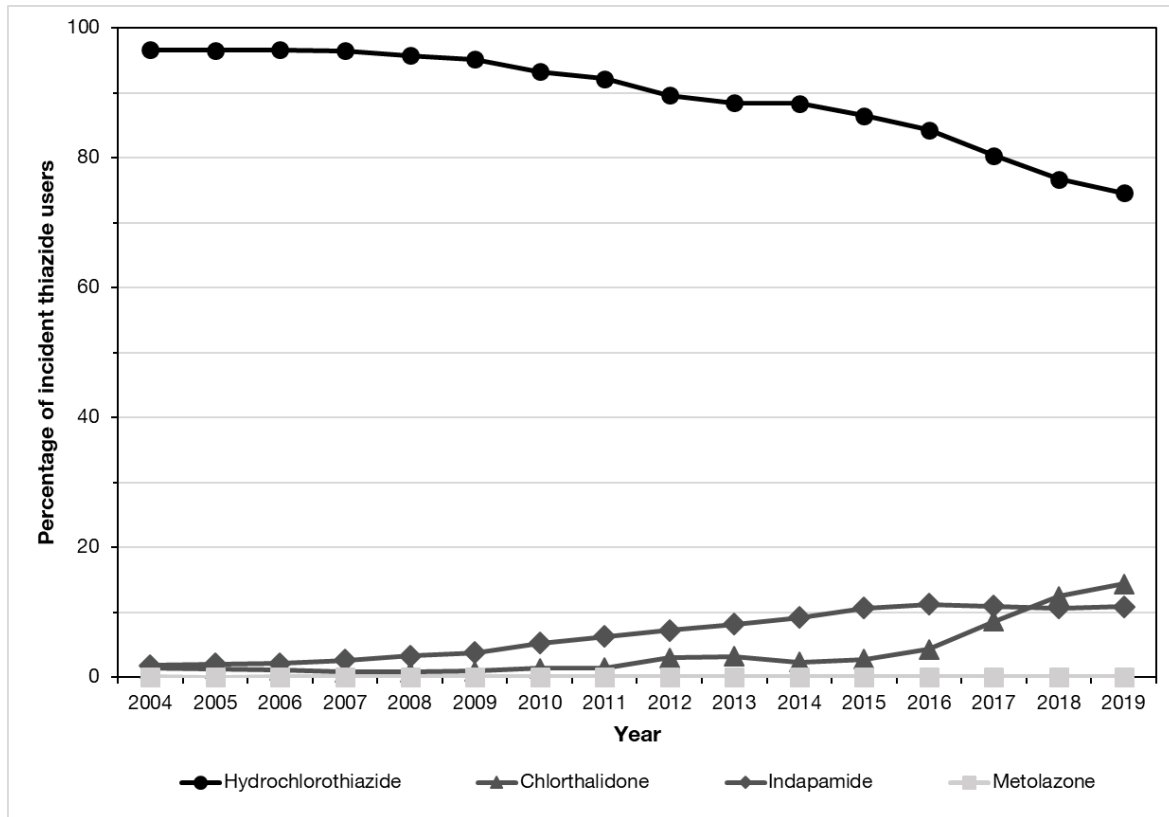

Figure S1. Percentage of incident thiazide users between 2004 and 2019.
